# Supplementary material
Source: Elsevier journal article supplement (https://www.sciencedirect.com/science/article/pii/S0211139X22000117)
Supplement: mmc1 [file S0211139X22000117:mmc1.xlsx]

## Sheet: Tabla A anexo
Anexo 1 Indicadores incluidos en los informes de Central de Resultados. Ámbito de hospitalización sociosanitaria, datos 2012-2017.
Indicadores	Dimensiones de desagrgación	Número de informe CdR ámbito sociosanitario
		1º	2º	3º	4º	5º	6º
		Datos
		2012	2013	2014	2015	2016	2017
Larga estancia
Número episodios	Totals	x	x	x	x	x	x
	Fractura cuello de fémur		x
	Ictus		x
	ICC o EPOC		x
	Demencia (diagnóstico prinicpal)		x
	Demencia (diagnóstico prinicpal o secundario)		x
	RUG-III A con mejora funcional						x
Número d'episodis finalitzats		x	x	x
Dies d’estada (d’episodis acabats)		x	x	x	x	x	x
Estada mediana	Total	x	x	x	x	x	x
	Episodios con circustancia de alta defunción		x	x
	Demencia (diagnóstico prinicpal)		x
	fractura de cuello de fémur			x
	ictus			x
	ICC			x
	EPOC			x
	Episodios oncológicos con circustancia de alta defunción			x
	Grupo RUG-III A				x	x	x
	Grupo RUG-III B, C y D					x
Estada mitjana	Total	x			x	x	x
	Demencia (diagnóstico prinicpal)		x	x
% episodios LLE respecto al total de la actividad de internamiento		x
Media de puntos de mejora funcionales conseguidos		x
Mediana de puntos de mejora de los episodios que han mejorado	Total		x	x
	Grupo RUG-III A				x	x
	Grupo RUG-III B, C y D					x
Mediana de puntos de mejora funcional (<30 días)	total						x
	en dependientes leves						x
	en dependientes moderados						x
	en dependientes severos						x
Mediana de puntos de mejora funcional (<45 días)	total						x
	en dependientes leves						x
	en dependientes moderados						x
	en dependientes severos						x
Mediana de puntos de mejora funcional (<90 días)	total						x
	en dependientes leves						x
	en dependientes moderados						x
	en dependientes severos						x
% episodios	Úleras por presión grado III-IV	x
	Fractura cuello de fémur		x	x
	Ictus		x	x
	ICC o EPOC		x
	ICC			x
	MPOC			x
	Demencia (diagnóstico prinicpal)		x	x
	Demencia (diagnóstico prinicpal o secundario)		x	x
	Han mejorado estado funcional		x	x
	Codificados con V66.7		x	x
	Circunstancia de alta defunción		x	x
	Demencia (diagnóstico prinicpal) con estancias inferiores a 80 días		x
	Incidencia úlceras grado III y IV		x	x	x	x	x
	Incidencias úlceras de cualquier grado		x	x	x	x	x
	Destinación domicilio			x
	Grupo RUG-III A				x	x	x
	Grupo RUG-III A con destinación domicilio				x	x	x
	Grupo RUG-III A que han mejorado estado funcional				x	x
	Grupo RUG-III A que han mejorado o mantenido estado funcional						x
	Grupo RUG-III A con mejora funcional y retorno a domicilio						x
	Grupo RUG-III A con circunstancia de alta defunción				x	x	x
	Grupo RUG-III B, C y D				x	x	x
	Grupo RUG-III B, C y D con destinación domicilio					x	x
	Grupo RUG-III B, C y D que han mejorado estado funcional					x
	Grupo RUG-III B, C y D que han mejorado o han mantenido el estado funcional						x
	Grupo RUG-III B, C y D con circunstancia de alta defunción					x	x
	Grupo RUG-III E, F y G				x
Personas atendidas			x	x	x	x	x
Media de edad		x	x		x	x	x
Episodios con circunstancia de alta defunción por 100 días de estancia			x
% Defunciones correspondientes a pacientes oncològicos			x	x
Convalecencia
Número de personas atendidas			x	x	x	x	x
% episodios convalescencia respecto al total de la actividad de internamiento		x
Días de estancia (de episodios finalizados)		x	x	x	x	x	x
Estancia mediana	Total	x	x	x	x	x	x
	Fractura de cuello de fémur		x	x
	Ictus		x	x
	ICC o EPOC		x
	ICC			x
	EPOC			x
	Episodios con circunstancia de alta defunción		x	x
	Episodios oncológicos con circunstrancia de alta defunción			x
	Demencia (diagnóstico prinicpal)		x
	Grupo RUG-III A				x	x	x
	Grupo RUG-III A que procede del hospital				x	x	x
Estancia media	Total	x			x	x	x
	fractura de cuello de fémur		x
	ictus		x
	ICC o EPOC		x
	Demencia (diagnóstico prinicpal)		x	x
Media de edad		x	x		x	x	x
Número episodios	finalizados	x	x
	fractura de cuello de fémur finalizados		x
	ictus finalizados		x
	ICC o EPOC finalizados		x
	Demencia (diagnóstico prinicpal) finalizados		x
	total	x	x	x	x	x	x
	Pcientes con RUG-III A
	fractura de cuello de fémur		x
	ictus		x
	ICC o EPOC		x
	Circunstancia de alta defunción		x
	Demencia (diagnóstico prinicpal)		x
	Demencia (diagnóstico prinicpal o secundario)		x
	Con úlceras por presión grado III-IV	x
	Ictus con destinación domicilio	x
	ictus con destinación hospital de agudos o psiquiátrico	x
	ictus con destinación centro o servicio sociosanitario	x
	ictus con destinación residencia social	x
	Ictus con destinación defunción	x
	ictus con destinación otras circunstancias	x
	fractura cuello de fémur con destinación domicilio	x
	fractura cuello de fémur con destinación hospital de agudos o psiquiátrico	x
	fractura de fémur con destinación centro o servicio sociosantiario	x
	fractura cuello de fémur con destinación residencia social	x
	fractura cuello de fémur con destinación defunción	x
	fractura cuello de fémur con destinación otras circunstancias	x
	diagnóstico principal de demencia y destinación a domicilio		x	x
% Episodios	fractura de cuello de fémur		x	x
	ictus		x	x
	ICC o EPOC		x
	ICC			x
	EPOC			x
	Destinación domicilio	x	x	x
	Circunstancia de alta defunción		x	x
	Ictus con destinación domicilio		x	x
	ictus dados de alta	x
	fractura cuello de fémur con destinación domicilio		x	x
	fractura cuello de fémur dados de alta	x
	ICC con destinación domicilio			x
	EPOC con destinación domicilio			x
	ICC o EPOC con destinación domicilio		x	x
	Con código V66.7		x	x
	Demencia (diagnóstico prinicpal)		x	x
	Demencia (diagnóstico prinicpal o secundario)		x	x
	Demencia (diagnóstico prinicpal) con estancia inferior a 35 días		x
	Demencia (diagnóstico prinicpal) con destinación domicilio			x
	Grupo RUG-III A				x	x	x
	RUG-III A con destinación domicilio				x	x	x
	Grupo RUG-III A con alta por defunción				x	x	x
	que han mejorado estado funcional		x	x
	Grupo RUG-III A que han mejorado estado funcional				x	x	x
	Grupo RUG-III A que han mejorado estado funcional con retorno a domicilio						x
	grupo RUG-III B, C y D				x	x	x
	Grupo RUG-III E, F y G				x
	Con úlceras por presión grado III-IV	x
	Incidencia de úlderas por presión grado III-IV		x	x	x	x	x
	Incidencia de úlceras por presión de cualquier grado		x	x	x	x	x
Media de puntos de mejora funcionales conseguidos		x
Mediana de puntos de mejora de los episodios que han mejorado	total		x	x
	grupo RUG-III A				x	x	x
Mediana de puntos de mejora funcional (<30 días)	total						x
	en dependientes leves						x
	en dependientes moderados						x
	en dependientes severos						x
Mediana de puntos de mejora funcional (<45 días)	total						x
	en dependientes leves						x
	en dependientes moderados						x
	en dependientes severos						x
Mediana de puntos de mejora funcional (<90 días)	total						x
	en dependientes leves						x
	en dependientes moderados						x
	en dependientes severos						x
Episodios con circunstancia de alta defunción (por 100 días de estancia)			x
% Defunciones correspondientes a pacientes oncológicos			x	x
Reingresos a 30 o menos días	En convalescencia						x
	En larga estancia						x
	En hospital de agudos						x
Cuidados paliativos
Número de personas atendidas			x	x	x	x	x
Número de episodios	total	x	x	x	x	x	x
	circunstancia de alta defunción		x
	Demencia (diagnóstico prinicpal)		x
	Demencia (diagnóstico prinicpal o secundario)		x
	Finalizados	x	x
% episodios CP respecto al total de la actividad de internamiento		x
Días de estancia (de los episodis finalizados)		x	x	x	x	x	x
Estancia mediana	total	x	x	x	x	x	x
	Episodios con circunstancia de alta defunción		x	x	x	x	x
	Episodis oncològics amb èxitus			x	x	x	x
Estancia media	Total	x			x	x	x
	Demencia (diagnóstico prinicpal)			x
Media de edad		x	x		x	x	x
% Episodios	Con código V66.7		x	x	x	x	x
	Circunstancia de alta defunción	x	x	x	x	x	x
	Demencia (diagnóstico prinicpal)		x	x
	Demencia (diagnóstico prinicpal o secundario)		x	x
	Demencia (diagnóstico prinicpal)			x
	Con destinación a domicilio	x			x	x	x
	Oncológicos				x	x	x
Episodios con circunstancia de alta defunción por 100 días de estancia			x
% Defunciones correspondientes a pacientes oncológicos			x	x	x	x	x
Subagudos
Número de personas atendidas			x	x	x	x	x
Número de episodios	Totales		x	x	x	x	x
	Finalizados		x
Días de estancia (de los episodis finalizados)			x	x	x	x	x
Estancia mediana			x	x	x	x	x
Estancia media					x	x	x
Media de edad		x	x		x	x	x
% Episodios	Circunstancia de alta defunción				x	x	x
	Destinación domicilio				x	x	x
RUG III A: grupo del Resource Utilization Groups III que requieren rehabilitación específica. RUG III B, C, D: grupos del Resource Utilization Groups III que requieren tratamientos extensivos (B), cuidados especiales (C) o presentan complejidad clínica (D). RUG III E,F,G: grupos del Resource Utilization Groups III que presentan deterioro cognitivo (E), problemas de comportamiento (F) o tienen fun…
Fuente: Propia a partir de los Informes de Central de Resultados del ámbito sociosanitario del Observatorio del Sistema de Salud de Cataluña. Datos 2012-2017.
